# Supplementary material
Source: ML conference proceedings conference paper supplement (https://proceedings.neurips.cc/paper_files/paper/2010/hash/6cdd60ea0045eb7a6ec44c54d29ed402-Abstract.html)
Supplement: Supplementary file [file 6cdd60ea0045eb7a6ec44c54d29ed402-Supplemental.zip]

---

# Supplement to Fast Large-scale Mixture Modeling with Component-specific Data Partitions

---

Bo Thiesson\*  
Microsoft Research

Chong Wang\*†  
Princeton University

## Appendix: Efficient Variational E-step

As we have shown in the main paper, the optimal  $q_{B_k}$  satisfies

$$q_{B_k}(\lambda) = \exp\left(\frac{\sum_{l: B_l \subseteq B_k} \lambda_l}{|B_k|} - 1\right) \pi_k \exp(g_{B_k}). \quad (1)$$

Algorithm 1 (on p. 3) describes the general algorithm for finding the optimal solution, which first traverses  $\mathcal{T}$  bottom up, level by level and gradually reduces the nested constraints to a single equation involving only one  $\lambda_l$ . After solving this equation the algorithm now traverses  $\mathcal{T}$  top down, level by level and gradually resolves the remaining Lagrange multipliers  $\lambda_l, l \in \mathcal{L}$  by back-substitution of previously resolved  $\lambda_l$ . The resolved Lagrange multipliers can now be used to find the desired variational distribution  $q$ . The next corollary is useful for the detailed description of the individual steps in Algorithm 1 that follows below.

**Corollary 1.** *Let  $i, i^* \in \{1, \dots, I\}$ . If*

$$\exp\left(\frac{\lambda_i}{|B_i|} - 1\right) D_i = \exp\left(\frac{\lambda_{i^*}}{|B_{i^*}|} - 1\right) D_{i^*}$$

*then*

$$\lambda_i = |B_i| \left( \frac{\lambda_{i^*}}{|B_{i^*}|} + \log D_{i^*} - \log D_i \right).$$

**Initialization.** Let  $\mathcal{V}$  denote the set of nodes in the MPT  $\mathcal{T}$ . When computing the solution for the variational distribution it is convenient to define three scalar values  $K_v, C_v$ , and  $D_v$  for each  $v \in \mathcal{V}$ . Initially,

$$\begin{aligned} K_v &= 0, \\ C_v &= \sum_{k \in \mathcal{K}_v} \pi_k \exp(g_{B_k}), \\ D_v &= C_v, \end{aligned} \quad (2)$$

where  $\mathcal{K}_v$  denote the set of mixture components for which its data partition has a data block associated with node  $v$ . For each  $v \in \mathcal{V}$ , we define the *node distribution*

$$q_v = \sum_{k \in \mathcal{K}_v} q_{B_k} = \exp\left(\frac{\sum_{l: B_l \subseteq B_v} \lambda_l}{|B_v|} - 1\right) C_v, \quad (3)$$

where the second equality follows from (1) and (2).

**Collect-up.** Collect-up traverses the tree  $\mathcal{T}$  bottom up, level by level, where each step in this traversal considers a node  $v$  and its children  $u \in ch(v)$ . The crux of a collect-up step is a manipulation of the parent-node distribution  $q_v$  in such a way that the  $\sum_{l: B_l \subseteq B_v} \lambda_l$  is replaced by a single  $\lambda_l = \lambda_{l_v^*}$  of reference, where the index  $l_v^*$  emphasises that it is a reference- $\lambda$  that has been selected at node  $v$ . In particular, as described below, the collect-up step will transform the representation in (3) into a representation

$$q_v = \exp\left(\frac{\lambda_{l_v^*}}{|B_{l_v^*}|} - 1\right) C_v \exp\left(\frac{K_v}{|B_v|}\right) \quad (4)$$

---

\*Equal contributors. †Work done during internship at Microsoft Research.

by deriving the equality

$$\sum_{l: B_l \subseteq B_v} \lambda_l = |B_v| \frac{\lambda_{l_v^*}}{|B_{l_v^*}|} + K_v, \quad (5)$$

assuming a similar representation for each child-node distribution  $q_u$ ,  $u \in ch(v)$ . Note that node distributions at leaf nodes only involve one  $\lambda$  and therefore trivially obey this condition, so traversal starts one level above. The transformation starts by the equality (recall that  $u \in ch(v)$ ),

$$\sum_{l: B_l \subseteq B_v} \lambda_l = \sum_u \sum_{l: B_l \subseteq B_u} \lambda_l = \sum_u |B_u| \frac{\lambda_{l_u^*}}{|B_{l_u^*}|} + K_u, \quad (6)$$

which implies that the  $\sum_{l: B_l \subseteq B_v} \lambda_l$  involved in the parent-node distribution  $q_v$  can be reduced to an expression involving just the  $\lambda_{l_u^*}$  of reference for each of the  $|ch(v)|$  children. In order to transform Eq. (6) into one that involves only the single  $\lambda_{l_v^*}$  of reference, we apply the following procedure.

Let  $l \mapsto r$  denote the path of nodes ( $l = w_1, w_2, \dots, w_n = r$ ) from leaf  $l$  to root  $r$  in  $\mathcal{T}$ , and  $w_i \mapsto w_j, 1 \leq i, j \leq n$  denote a subpath of  $l \mapsto r$ . With the notation  $q_{w_i \mapsto w_j} = \sum_{w \in w_i \mapsto w_j} q_w$ , the sum-to-one constraints in the main paper can be written as

$$q_{l \mapsto r} = q_{l \mapsto u} + q_{v \mapsto r} = 1 \text{ for all } l \in \mathcal{L}, \quad (7)$$

where  $u \in ch(v)$  and  $v \in \mathcal{V}$  are both on the path  $l \mapsto r$ . Since all children share the same path  $v \mapsto r$  from their parent to the root, the constraints in (7) imply equality of all  $q_{l \mapsto u}, u \in ch(v)$ . In particular, we can ensure that for each  $u \in ch(v)$  there exists a path, where the reference- $\lambda$ s for all nodes on the path to  $u$  are the same. (E.g., we can always choose the reference- $\lambda$  associated with the left-most child at each step in the traversal.) We can therefore construct

$$q_{l_u^* \mapsto u} = \exp\left(\frac{\lambda_{l_u^*}}{|B_{l_u^*}|} - 1\right) D_u, \quad (8)$$

where

$$D_u = \sum_{w \in l_u^* \mapsto u} C_w \exp\left(\frac{K_w}{|B_w|}\right). \quad (9)$$

Thus, the condition for Corollary 1 is satisfied for all  $q_{l_u^* \mapsto u}, u \in ch(v)$ , allowing us to select one of the  $\lambda_{l_u^*}$  as the  $\lambda_{l_v^*}$  and represent each  $\lambda_{l_u^*}$  as

$$\lambda_{l_u^*} = |B_{l_u^*}| \left( \frac{\lambda_{l_v^*}}{|B_{l_v^*}|} + \log D_{u^*} - \log D_u \right). \quad (10)$$

where  $u^*$  denotes the child with the chosen  $\lambda_{l_u^*} = \lambda_{l_v^*}$  of reference. Substituting (10) into (6), we have

$$\begin{aligned} \sum_{l: B_l \subseteq B_v} \lambda_l &= \sum_u \left( |B_u| \left( \frac{\lambda_{l_u^*}}{|B_{l_u^*}|} + \log D_{u^*} - \log D_u \right) + K_u \right) \\ &= |B_v| \frac{\lambda_{l_v^*}}{|B_{l_v^*}|} + |B_v| \log D_{u^*} + \sum_u (-|B_u| \log D_u + K_u) \\ &\triangleq |B_v| \frac{\lambda_{l_v^*}}{|B_{l_v^*}|} + K_v, \end{aligned} \quad (11)$$

which is the desired equality in (5) leading to the representation of  $q_v$  as in (4) by substituting into (3). We are now ready for the next collect-up step.

The collect-up step is summarized by the following updates

$$K_v \leftarrow |B_v| \log D_{u^*} + \sum_u (-|B_u| \log D_u + K_u), \quad (12)$$

$$D_v \leftarrow C_v \exp\left(\frac{K_v}{|B_v|}\right) + D_{u^*}, \quad (13)$$

which are induced from Eqs. (11) and (9).

**Distribute-down.** After a collect-up traversal, each node in  $\mathcal{T}$  is associated with a particular reference- $\lambda$ , and these reference- $\lambda$ s are related as in (10). Distribute-down traverses  $\mathcal{T}$  top down, where each step uses the reference- $\lambda$  in the parent node to resolve the reference- $\lambda$ s associated with its child nodes. Notice that the update is redundant for the particular child with reference- $\lambda$  chosen as the reference- $\lambda$  for the parent in the collect-up traversal, where we simply have,  $\lambda_{l_u^*} = \lambda_{l_v^*}$ . The root node starts the recursion and needs special treatment. The constraints in (7) imply that

$$p_{l_r^* \mapsto r} = \exp\left(\frac{\lambda_{l_r^*}}{|B_{l_r^*}|} - 1\right) D_r = 1,$$

which can be solved to obtain

$$\lambda_{l_r^*} = |B_{l_r^*}|(1 - \log D_r). \quad (14)$$

**Finalize.** With  $\lambda_l$  available for all  $l \in \mathcal{L}$ , we can determine all  $q_{B_k}$  by simply inserting the appropriate  $\sum \lambda_l$  into (1). Alternatively, it is more efficient to update  $q_{B_k}$ s during the distribute-down step, since  $\lambda_{l_v^*}$  is available at this point, and  $\sum \lambda_l$  therefore can be computed using Eq (5).

---

**Algorithm 1** Variational E-step

---

```

//Initialization
for all nodes  $v \in \mathcal{V}$  in MPT  $\mathcal{T}$  do
    Initialize  $K_v, C_v,$  and  $D_v$  as in (2)
end for
//Collect-up
for all  $v \in \mathcal{V}$ ; traversed bottom up, level by level do
    if  $v$  is a leaf  $l \in \mathcal{L}$  then
        Set pointer:  $*\lambda_v = *\lambda_l$ 
    else
        Select  $u \in ch(v)$  and set pointer:  $*\lambda_v = *\lambda_u$ 
        Update  $K_v$  and  $D_v$  as in (12) and (13)
    end if
end for
//Distribute-down and Finalize
for all  $v \in \mathcal{V}$ ; traversed top down, level by level do
    if  $v$  is the root then
        Set value  $\lambda_v = \lambda_{l_r^*}$  as in (14)
    else
        Set value  $\lambda_v = \lambda_{l_v^*}$  as in (10)
        for all  $k \in \mathcal{K}_v$  do
            Compute  $q_{B_k}$  as in (1) using (5).
        end for
    end if
end for

```

---
